# Supplementary material for: Oregano Phytocomplex Induces Programmed Cell Death in Melanoma Lines via Mitochondria and DNA Damage
Source: PubMed Central journal article supplement (PMC7603152; doi:10.3390/foods9101486), 2020-10-17
Supplement: foods-09-01486-s001.pdf [file foods-09-01486-s001.pdf]

**TABLE S1 – Nanni et al.**

| Gene name    | Primers                                                             | References              |
|--------------|---------------------------------------------------------------------|-------------------------|
| <i>MITF</i>  | F: 5'-CTGGAAATGCTAGAATACAG-3'<br>R: 5'-TCTTCTTCTTCGTTCAATCA-3'      | Mansky et al., 2002     |
| <i>TYR</i>   | F: 5'-ATTGATTTTGCCCATGAAGC-3'<br>R: 5'-CCCAGATCCTTGGATGTTATG-3'     | Vetrini et al., 2004    |
| <i>TYRP1</i> | F: 5'-ACTGACCCTTGTGGCTCATC-3'<br>R: 5'-GAGAAATCCACATCCCCAAA-3'      | Vetrini et al., 2004    |
| <i>P21</i>   | F: 5'-AGACCAGCATGACAGATTTTC-3'<br>R: 5'-ACTGAGACTAAGGCAGAAGA-3'     | Zhang et al., 2017      |
| <i>P27</i>   | F: 5'-ATAAGGAAGCGACCTGCAAC-3'<br>R: 5'-ACGTTTGACGTCTTCTGAGG-3'      | Zhang et al., 2017      |
| <i>P53</i>   | F: 5'-GTGAGCGCTTCGAGATGTTTC-3'<br>R: 5'-CCCTTCTGTCTTGAACATGAG-3'    | Zhang et al., 2017      |
| <i>CCNB1</i> | F: 5'-GACCTGTGTCAGGCTTTCTCTG-3'<br>R: 5'-GGTATTTTGGTCTGACTGCTTGC-3' | Lin et al., 2017        |
| <i>CDK1</i>  | F: 5'-GGAAACCAGGAAGCCTAGCATC-3'<br>R: 5'-GGATGATTCAGTGCCATTTTGCC-3' | Lin et al., 2017        |
| <i>ACTB</i>  | F: 5'-ACCACCATGTACCCTGGCATT-3'<br>R: 5'-CCACACGGAGTACTTGCGCTCA-3'   | Simard and Chabot, 2000 |

**Table S1. RT-qPCR primers.** The primer sequences used in RT-qPCR analysis and relative references were reported.

#### References

Mansky, K.C., Sulzbacher, S., Purdom, G., Nelsen, L., Hume, D.A., Rehli, M., & Ostrowski, M.C. (2002). The microphthalmia transcription factor and the related helix-loop-helix zipper factors TFE-3 and TFE-C collaborate to activate the tartrate-resistant acid phosphatase promoter. *J Leukoc Biol*, 71, 304-310.

Vetrini, F., Auricchio, A., Du, J., Angeletti, B., Fisher, D.E., Ballabio, A., & Marigo, V. (2004). The microphthalmia transcription factor (*Mitf*) controls expression of the ocular albinism type 1 gene: link between melanin synthesis and melanosome biogenesis. *Mol Cell Biol*, 24, 6550-6559.

Zhang, Y., Yuan, Y., Liang, P., Guo, X., Ying, Y., Shu, X.S., Gao, M.Jr., & Cheng, Y. (2017). OSR1 is a novel epigenetic silenced tumor suppressor regulating invasion and proliferation in renal cell carcinoma. *Oncotarget*, 8, 30008-30018.

Lin, Y.T., Lin, C.C., Wang, H.C., & Hsu, Y.C. (2017). Induction of mitotic delay in pharyngeal and nasopharyngeal carcinoma cells using an aqueous extract of *Ajuga bracteosa*. *Int J Med Sci*, 14, 462-469.

Simard, M.J., & Chabot, B. (2000). Control of hnRNP A1 alternative splicing: an intron element represses use of the common 3' splice site. *Mol Cell Biol*, 20, 7353-7362.

**TABLE S2 – Nanni et al.**

| Strain | Concentration<br>(mg/plate) | - S9                 |     | +S9                  |      |
|--------|-----------------------------|----------------------|-----|----------------------|------|
|        |                             | No. Colonies ±<br>SD | t/c | No. Colonies ±<br>SD | t/c  |
| TA97A  | DMSO                        | 112.3 ± 8.08         | 1.0 | 135.0 ± 8.19         | 1.0  |
|        | C+                          | 424.3 ± 21.73        | 3.8 | 607.7 ± 25.70        | 4.5  |
|        | 0.1                         | 150 ± 1.41           | 1.3 | 150 ± 7.07           | 1.1  |
|        | 0.07                        | 157 ± 4.24           | 1.4 | 132.5 ± 6.36         | 1.0  |
|        | 0.05                        | 129.5 ± 2.12         | 1.2 | 124.5 ± 13.44        | 0.9  |
|        | 0.03                        | 130 ± 4.24           | 1.2 | 145.5 ± 6.36         | 1.1  |
|        | 0.01                        | 124.5 ± 10.61        | 1.1 | 137 ± 7.07           | 1.0  |
| TA98   | DMSO                        | 25.0 ± 4.58          | 1.0 | 35.3 ± 6.66          | 1.0  |
|        | C+                          | 92.3 ± 8.50          | 3.7 | 718.7 ± 64.70        | 20.3 |
|        | 0.1                         | 35.5 ± 3.54          | 1.4 | 45.5 ± 2.12          | 1.3  |
|        | 0.07                        | 35 ± 1.41            | 1.4 | 43.5 ± 3.54          | 1.2  |
|        | 0.05                        | 29.5 ± 2.12          | 1.2 | 37.5 ± 3.54          | 1.1  |
|        | 0.03                        | 26.5 ± 0.71          | 1.1 | 36.5 ± 0.71          | 1.0  |
|        | 0.01                        | 25.5 ± 0.71          | 1.0 | 37.5 ± 0.71          | 1.1  |
| TA100  | DMSO                        | 95.3 ± 7.37          | 1.0 | 116.3 ± 8.74         | 1.0  |
|        | C+                          | 617.7 ± 15.50        | 6.5 | 525.7 ± 25.58        | 4.5  |
|        | 0.1                         | 97.5 ± 2.12          | 1.0 | 157 ± 1.41           | 1.3  |
|        | 0.07                        | 108.5 ± 4.95         | 1.1 | 140 ± 8.49           | 1.2  |
|        | 0.05                        | 117 ± 8.49           | 1.2 | 132 ± 5.66           | 1.1  |
|        | 0.03                        | 94 ± 5.66            | 1.0 | 146 ± 15.56          | 1.3  |
|        | 0.01                        | 89.5 ± 2.12          | 0.9 | 127 ± 1.41           | 1.1  |
| TA1535 | DMSO                        | 20.3 ± 3.06          | 1.0 | 14.3 ± 2.08          | 1.0  |
|        | C+                          | 122.0 ± 5.57         | 6.0 | 92.7 ± 7.37          | 6.5  |
|        | 0.1                         | 26.5 ± 2.12          | 1.3 | 16.5 ± 0.71          | 1.2  |
|        | 0.07                        | 24.5 ± 0.71          | 1.2 | 15.5 ± 0.71          | 1.1  |
|        | 0.05                        | 23.5 ± 0.71          | 1.2 | 17 ± 1.41            | 1.2  |
|        | 0.03                        | 20 ± 2.83            | 1.0 | 14.5 ± 0.71          | 1.0  |
|        | 0.01                        | 20 ± 1.41            | 1.0 | 14 ± 1.41            | 1.0  |

**Table S2. Ames test for mutagenic analysis.** TA97a, TA98, TA1535 and TA100 were treated with different concentration of HCOE, with and without metabolic activator (+S9 mix, -S9 mix, respectively). Negative control was represented by DMSO treatment. Positive controls (C+), in absence of S9 mix, were represented by 2-nitrofluorene for TA97a, TA98 and TA1535 strains and by sodium azide for TA100 strains, while, in presence of S9 mix, by 2-aminoanthracene for all *Salmonella* strains. Results are expressed as average number of colonies per plate ± SD T/c is the ratio between the number of *Salmonella* colonies grown in presence of HCOE and those of the negative controls (C-).

**TABLE S3 – Nanni et al.**

| Strain | Concentration (mg/plate) | - S9                  |        | +S9                   |        |
|--------|--------------------------|-----------------------|--------|-----------------------|--------|
|        |                          | No. Colonies $\pm$ SD | IR (%) | No. Colonies $\pm$ SD | IR (%) |
| TA97A  | DMSO                     | 137.7 $\pm$ 5.51      | --     | 145.7 $\pm$ 9.07      | --     |
|        | C                        | 540.0 $\pm$ 13.45     | --     | 638.0 $\pm$ 18.03     | --     |
|        | 0.1                      | 542.5 $\pm$ 17.68     | -0.6   | 628.5 $\pm$ 6.36      | 1.9    |
|        | 0.07                     | 534.5 $\pm$ 9.19      | 1.4    | 644 $\pm$ 18.38       | -1.2   |
|        | 0.05                     | 545 $\pm$ 2.83        | -1.2   | 642 $\pm$ 4.24        | -0.8   |
|        | 0.03                     | 521 $\pm$ 4.24        | 4.7    | 675 $\pm$ 35.36       | -7.5   |
|        | 0.01                     | 517 $\pm$ 8.49        | 5.7    | 660.5 $\pm$ 7.78      | -4.6   |
| TA98   | DMSO                     | 29.3 $\pm$ 1.53       | --     | 38.0 $\pm$ 2.00       | --     |
|        | C                        | 139.7 $\pm$ 6.81      | --     | 612.0 $\pm$ 14.00     | --     |
|        | 0.1                      | 144.5 $\pm$ 2.12      | -4.4   | 618.5 $\pm$ 4.95      | -1.1   |
|        | 0.07                     | 141 $\pm$ 4.24        | -1.2   | 656.5 $\pm$ 13.44     | -7.8   |
|        | 0.05                     | 135.5 $\pm$ 7.78      | 3.8    | 605.5 $\pm$ 7.78      | 1.1    |
|        | 0.03                     | 144 $\pm$ 8.49        | -3.9   | 596 $\pm$ 9.90        | 2.8    |
|        | 0.01                     | 133.5 $\pm$ 4.95      | 5.6    | 597 $\pm$ 2.83        | 2.6    |
| TA100  | DMSO                     | 131.7 $\pm$ 4.04      | --     | 121.7 $\pm$ 3.79      | --     |
|        | C                        | 581.7 $\pm$ 4.04      | --     | 486.0 $\pm$ 12.12     | --     |
|        | 0.1                      | 625.5 $\pm$ 7.78      | -9.7   | 483 $\pm$ 9.90        | 0.8    |
|        | 0.07                     | 609.5 $\pm$ 38.89     | -6.2   | 476.5 $\pm$ 4.95      | 2.6    |
|        | 0.05                     | 577.5 $\pm$ 16.26     | 0.9    | 499 $\pm$ 46.67       | -3.6   |
|        | 0.03                     | 607.5 $\pm$ 50.20     | -5.7   | 460 $\pm$ 4.24        | 7.1    |
|        | 0.01                     | 589 $\pm$ 1.41        | -1.6   | 474.5 $\pm$ 37.48     | 3.2    |
| TA1535 | DMSO                     | 19.7 $\pm$ 1.15       | --     | 11.7 $\pm$ 1.53       | --     |
|        | C                        | 144.0 $\pm$ 7.00      | --     | 105.0 $\pm$ 7.55      | --     |
|        | 0.1                      | 138.5 $\pm$ 3.54      | 4.4    | 115.5 $\pm$ 6.36      | -11.3  |
|        | 0.07                     | 148.5 $\pm$ 6.36      | -3.6   | 120 $\pm$ 2.83        | -16.1  |
|        | 0.05                     | 142.5 $\pm$ 3.54      | 1.2    | 105.5 $\pm$ 2.12      | -0.5   |
|        | 0.03                     | 149 $\pm$ 1.41        | -4.0   | 102 $\pm$ 1.41        | 3.2    |
|        | 0.01                     | 134 $\pm$ 1.41        | 8.0    | 103.5 $\pm$ 3.54      | 1.6    |

**Table S3. Ames test for mutagen-protective analysis.** TA97a, TA98, TA1535 and TA100 were treated with mutagen agents, with and without metabolic activator (+S9 mix, -S9 mix, respectively), in absence (C) or presence of different HCOE concentrations. Negative control was represented by DMSO treatment. In absence of S9 mix, TA97a, TA98 and TA1535 strains were treated by 2-nitrofluorene, whereas TA100 strain was incubated with sodium azide. In presence of S9 mix, all *Salmonella* strains were exposed to 2-aminoanthracene. Results are expressed as average of number of colonies per plate  $\pm$  SD IR (%) represents the percentage of inhibition ratio. Positive values indicate protective activity.

**FIGURE S1 – Nanni et al.**

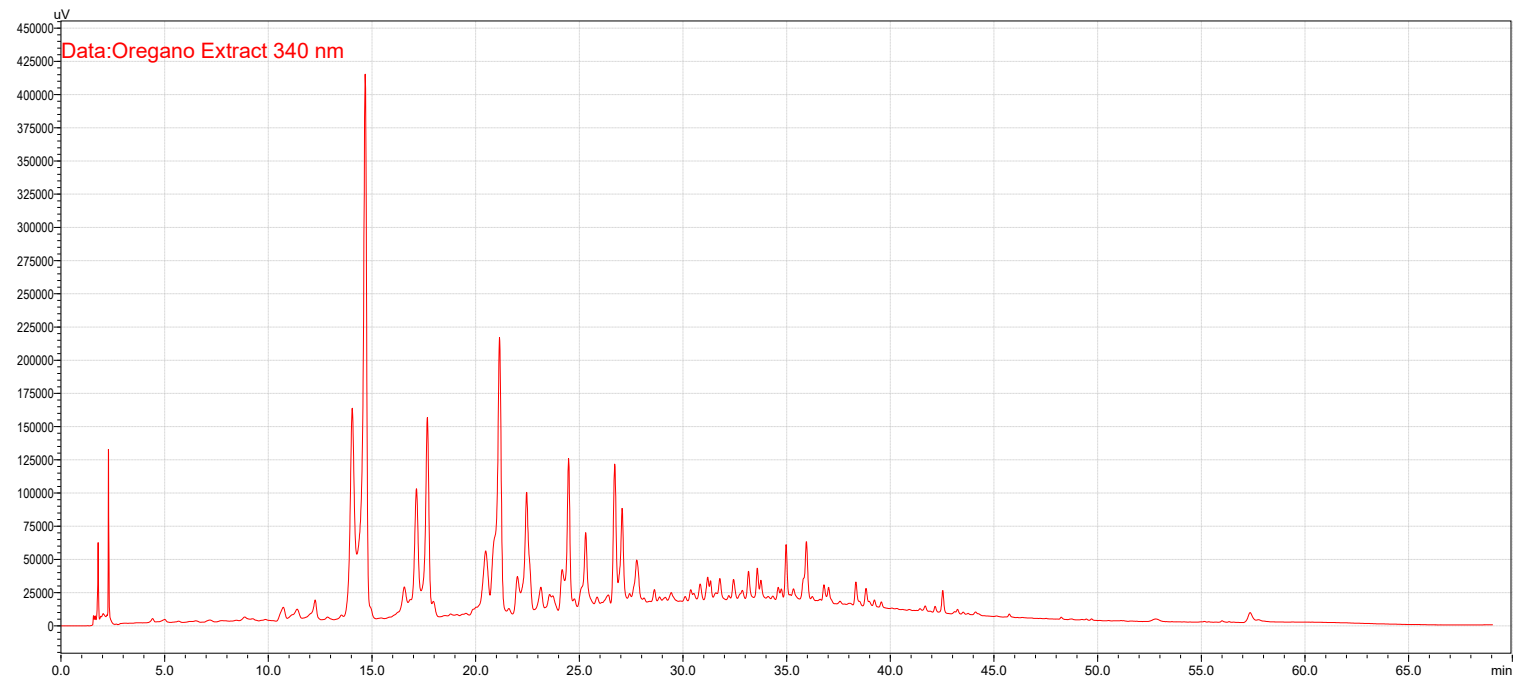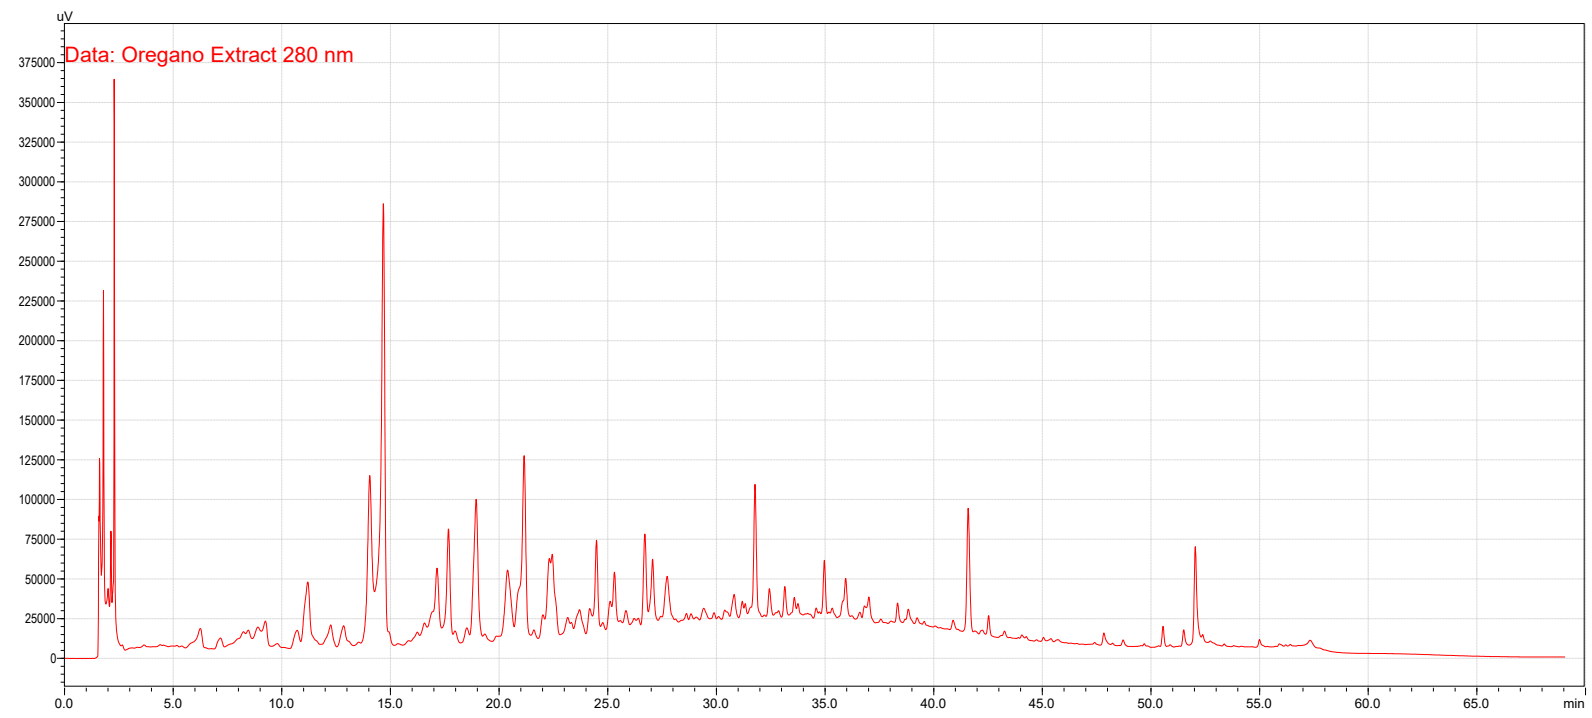

**FIGURE S1. HPLC-DAD qualitative analysis.** HPLC-DAD profiles of oregano extract acquired at 340 nm (absorption wavelength of flavonoids; upper panel) and 280 nm (absorption wavelength of phenols; lower panel).
